# Supplementary material for: Penile Anaerobic Dysbiosis as a Risk Factor for HIV Infection
Source: PubMed Central journal article supplement (PMC5527312; doi:10.1128/mbio.00996-17), 2017-07-25

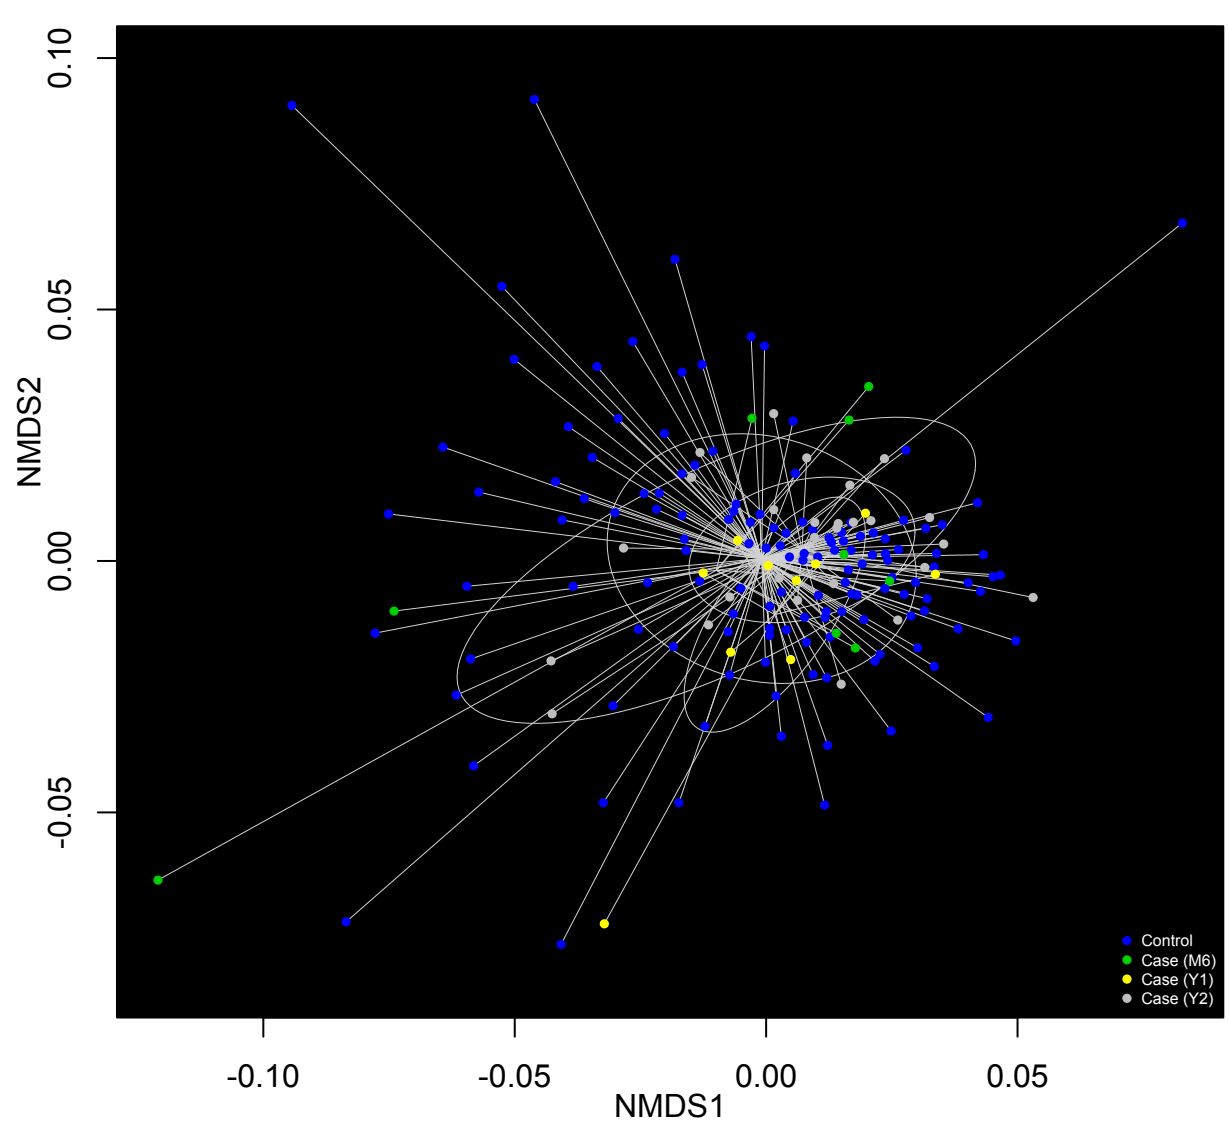

Supplement: mbo004173393sf2.pdf [file mbo004173393sf2.pdf]
